# Supplementary material for: Hydrothermal synthesis of g-C3N4/CdWO4nanocomposite and enhanced photocatalytic activity for tetracycline degradation under visible light
Source: Royal Society of Chemistry journal article supplement (doi:10.1039/c6ce01019a), 2016-01-01
Supplement: c6ce01019a1.pdf [file c6ce01019a1.pdf]

## Supplementary Information

### **Hydrothermal synthesis of g-C<sub>3</sub>N<sub>4</sub>/CdWO<sub>4</sub> nanocomposite and enhanced photocatalytic activity for tetracycline degradation under visible light**

Kai Huang<sup>a</sup>, Yuanzhi Hong<sup>b</sup>, Xu Yan<sup>c</sup>, Changyou Huang<sup>a</sup>, Jibin Chen<sup>a</sup>, Minyuan Chen<sup>a</sup>, Weidong Shi<sup>a\*</sup> and Chunbo Liu<sup>a\*</sup>

<sup>a</sup>School of Chemistry and Chemical Engineering, Jiangsu University, Zhenjiang, 212013, P. R. China

<sup>b</sup>School of Materials Science and Engineering, Jiangsu University, Zhenjiang, 212013, P. R. China

<sup>c</sup>School of Energy and Power Engineering, Jiangsu University, Zhenjiang, 212013, P. R. China

*\*Corresponding author: Tel.: +86 511 8879 0187 Fax: +86 511 8879 1108*

*E-mail address: [swd1978@ujs.edu.cn](mailto:swd1978@ujs.edu.cn) (W. Shi); [liuchunbojsu@163.com](mailto:liuchunbojsu@163.com)*

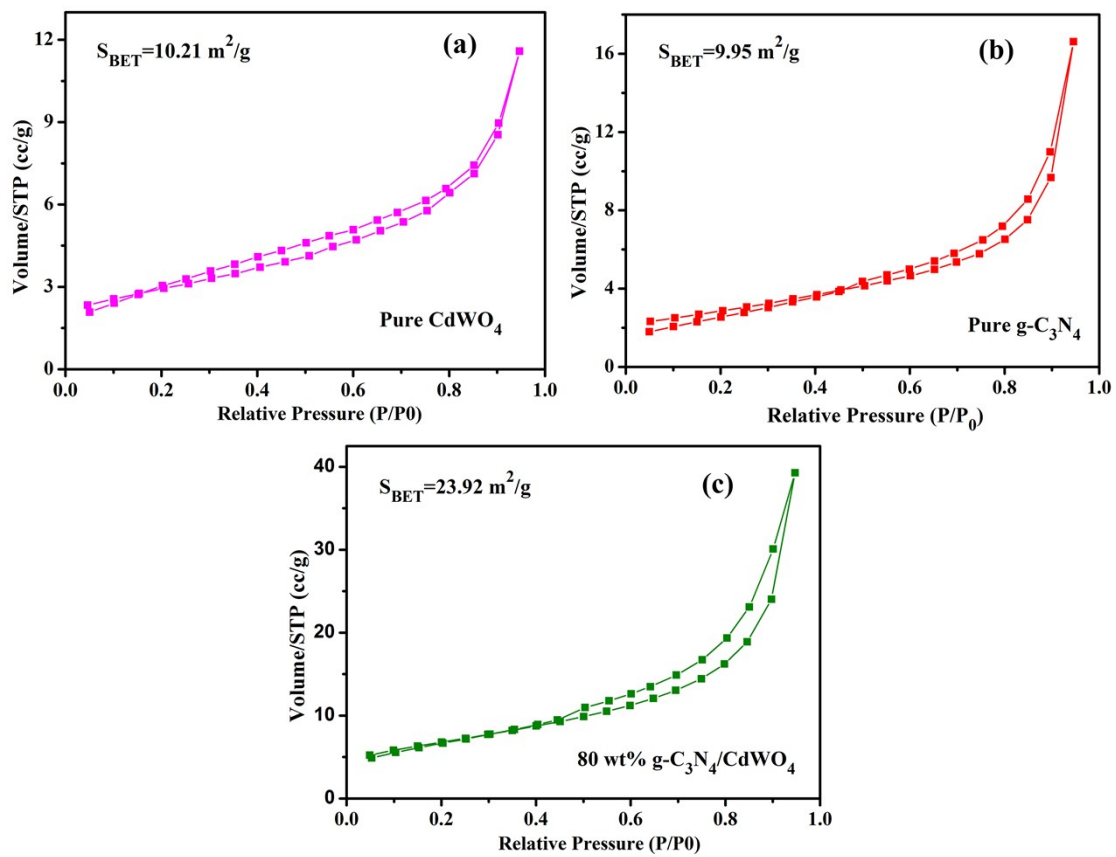

**Fig. S1.** N<sub>2</sub> adsorption–desorption isotherms of as-prepared samples.
